# Supplementary material for: Wall Thickness of Industrial Multi-Walled Carbon Nanotubes Is Not a Crucial Factor for Their Degradation by Sodium Hypochlorite
Source: MDPI journal article supplement (doi:10.3390/nano8090715), 2018-09-12

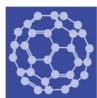

Supporting Information for

# Wall Thickness of Industrial Multi-Walled Carbon Nanotubes Is Not a Crucial Factor for Their Degradation by Sodium Hypochlorite

Alexander G. Masyutin <sup>1,\*</sup>, Dmitry V. Bagrov <sup>2</sup>, Irina I. Vlasova <sup>2</sup>, Igor I. Nikishin <sup>1</sup>, Dmitry V. Klinov <sup>2</sup>, Ksenia A. Sychevskaya <sup>3</sup>, Galina E. Onishchenko <sup>1</sup> and Maria V. Erokhina <sup>1</sup>

**Table S1.** Additions of NaOCl and water to suspensions of MWCNTs (0.5 mg/ml in water)

NaOCl<sup>low</sup> – low concentrations of NaOCl, stock solution was 100mM NaOCl, the concentration of NaOCl in a sample after addition of one unit dose was (1.0 ± 0.1) mM;

NaOCl<sup>high</sup> – high concentrations of NaOCl, stock solution was 1.2 M NaOCl, the concentration of NaOCl in a sample after addition of one unit dose was within the range 67–93 mM.

After NaOCl additions, the samples were mixed by the use of rotator Multi Bio RS-24 for 3 - 4 hours.

250 µl of MWCNTs in 0.5-ml eppendorfs

| Day of additions | Time          | Control     | NaOCl <sup>low</sup><br>100 mM NaOCl, µL | NaOCl <sup>high</sup><br>1.2 M NaOCl, µL |
|------------------|---------------|-------------|------------------------------------------|------------------------------------------|
| 1                | 3 pm          |             | 2.5                                      | 21                                       |
| 2                | 10 am<br>6 pm |             | 2.5<br>2.5                               | 21                                       |
| 3                | 10 am         |             | 2.5                                      |                                          |
| 4                | 11 am         |             | 2.5                                      |                                          |
| 5                | 6 pm          |             | 2.5                                      | 21                                       |
| 6                |               | 63 µL water | 48 µL water                              |                                          |
| 7                | 11 am<br>6 pm |             | 3<br>3                                   | 21                                       |
| 8                | 14 pm         |             | 3                                        | 21                                       |
| 9                | 12 pm         |             | 3                                        |                                          |
| 10               | 10 am         | 63 µL water | 3<br>21 µL water                         | 21                                       |

**Table S2.** Morphometric analysis. Statistically-significant difference between experimental groups.

Statistical processing was carried out using STATISTICA 10 software. To compare independent samples, the Student's test was used. The differences in the control and experimental samples were considered significant for  $p < 0.01$ .

| Parameter/<br>Samples                                | MWCNT-t          |                 | MWCNT-d          |                 |
|------------------------------------------------------|------------------|-----------------|------------------|-----------------|
|                                                      | D <sub>out</sub> | D <sub>in</sub> | D <sub>out</sub> | D <sub>in</sub> |
| NaOCl <sup>low</sup><br>versus Control               | $p > 0,05$       | $p = 0,00005$   | $p > 0,05$       | $p = 0,00000$   |
| NaOCl <sup>high</sup><br>versus Control              | $p > 0,05$       | $p = 0,00000$   | $p = 0,0002$     | $p = 0,00000$   |
| NaOCl <sup>high</sup><br>versus NaOCl <sup>low</sup> | $p > 0,05$       | $p = 0,002$     | $p = 0,0001$     | $p = 0,00000$   |

**Table S3. Raman spectroscopy.** I<sub>D</sub>/I<sub>G</sub> ratios of Raman spectra. Statistically-significant difference between experimental groups.

Statistical processing was carried out using STATISTICA 10 software. To compare independent samples, the Student's test was used. The differences in the control and experimental samples were considered significant for  $p < 0.01$ .

| I <sub>D</sub> /I <sub>G</sub> ratio/<br>Samples     | MWCNT-t      | MWCNT-d        |
|------------------------------------------------------|--------------|----------------|
|                                                      |              |                |
| NaOCl <sup>low</sup><br>versus Control               | $p = 0,006$  | $p = 0,000005$ |
| NaOCl <sup>high</sup><br>versus Control              | $p = 0,0032$ | $p = 0,005$    |
| NaOCl <sup>high</sup><br>versus NaOCl <sup>low</sup> | $p > 0,05$   | $p > 0,05$     |

**Table S4. Energy-dispersive X-ray spectroscopy.** Oxygen content. Statistically-significant difference between experimental groups.

Statistical processing was carried out using STATISTICA 10 software. To compare independent samples, the Mann-Whitney test was used. The differences in the control and experimental samples were considered significant for  $p < 0.05$ .

| Samples                                              | MWCNT-t     | MWCNT-d     |
|------------------------------------------------------|-------------|-------------|
| NaOCl <sup>low</sup><br>versus Control               | $p = 0,001$ | $p = 0,02$  |
| NaOCl <sup>high</sup><br>versus Control              | $p > 0,05$  | $p = 0,015$ |
| NaOCl <sup>high</sup><br>versus NaOCl <sup>low</sup> | $p > 0,05$  | $p > 0,05$  |

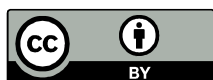

Supplement: s1 [file s1]
